# Supplementary material
Source: MDPI journal article supplement (https://www.mdpi.com/2311-5637/8/12/720)
Supplement: s1 [file s1]

Table S1: The numbers in the loading graphs of PCA represent the specific information of the compounds

| number | compounds                                | number | compounds                                         |
|--------|------------------------------------------|--------|---------------------------------------------------|
| 1      | ethyl caproate                           | 58     | 2,6,10-trimethyldodecane                          |
| 2      | ethanol                                  | 59     | methyl 2-(propanoylamino)benzoate                 |
| 3      | phenethyl alcohol                        | 60     | 7,9-dimethyl-hexadecane                           |
| 4      | benzyl alcohol                           | 61     | 1,3,5,7-cyclooctatetraene                         |
| 5      | decane                                   | 62     | 1-methyl-2-(3-methylpentyl)-<br>cyclopropane      |
| 6      | ethyl acetate                            | 63     | dihydroaplotaxene                                 |
| 7      | ethyl pentadecanoate                     | 64     | decene                                            |
| 8      | (R,R)-2,3-butanediol                     | 65     | ethyl butyrate                                    |
| 9      | ethyl octadecanoate                      | 66     | eicosane                                          |
| 10     | 2,3-butanediol                           | 67     | 2-furanmethanol                                   |
| 11     | 9,12-octadecadienoic acid ethyl<br>ester | 68     | methallyl alcohol                                 |
| 12     | ethyl myristate                          | 69     | crotonyl alcohol                                  |
| 13     | 2-phenyl-2-butenal                       | 70     | 2-methylhexadecanoic acid                         |
| 14     | 1,2-dimethoxybenzene                     | 71     | 11,14-eicosadienoic acid                          |
| 15     | acetaldehyde                             | 72     | methacrolein                                      |
| 16     | crotonaldehyde                           | 73     | 2-vinyl-2-butenal                                 |
| 17     | 2-acetyl pyrrole                         | 74     | (E,E)-2,4-hexadienal                              |
| 18     | 2,5-dimethyl-pyrazine                    | 75     | 2-ethyl-5-methyl-pyridine                         |
| 19     | ethyl oleate                             | 76     | ethyl 5-amino-1,2,3-thiadiazole-4-<br>carboxylate |
| 20     | styrene                                  | 77     | 3,5-dimethylpyrazole                              |
| 21     | phenol                                   | 78     | methyl anthranilate                               |
| 22     | 4,6-dimethyl-undecane                    | 79     | 3,8-dimethyl-undecane                             |
| 23     | dibutyl terephthalate                    | 80     | 2-ethyl-furan                                     |
| 24     | methanethiol                             | 81     | ethyl lactate                                     |
| 25     | ethyl isovalerate                        | 82     | isoamyl acetate                                   |
| 26     | 4-methylnonane                           | 83     | isobutyraldehyde                                  |
| 27     | 4,6-dimethyldodecane                     | 84     | isobutyl alcohol                                  |
| 28     | isobutyric acid                          | 85     | 2-pentylfuran                                     |
| 29     | diethyl phthalate                        | 86     | furfural                                          |
| 30     | 2-pyrrolecarbaldehyde                    | 87     | isopentyl alcohol                                 |
| 31     | ethyl isobutyrate                        | 88     | dodecane                                          |
| 32     | 2-methyl-pyrazine                        | 89     | ethyl (9E)-9-octadecenoate                        |
| 33     | 4,6-dimethyl-pyrimidine                  | 90     | isopentyl formate                                 |
| 34     | 2,3-dimethyl-pyrazine                    | 91     | 2,8-dimethylundecanoic acid methyl ester          |
| 35     | trimethyl-pyrazine                       | 92     | 11,14,17-eicosatrienoic acid                      |
| 36     | 1,2-dimethyl-hydrazine                   | 93     | 2,6-dimethyl-pyrazine                             |
| 37     | 2,2,4,6,6-pentamethyl-heptane            | 94     | 2,6-dimethyl-heptadecane                          |
| 38     | 2,2,11,11-tetramethyl-dodecane           | 95     | 2,5-dihydrofuran                                  |

|    |                              |     |                                          |
|----|------------------------------|-----|------------------------------------------|
| 39 | pentadecane                  | 96  | caryophyllene                            |
| 40 | 2,3,3-trimethyl-pentane      | 97  | methyl hexadecanoate                     |
| 41 | 2,3,4-trimethyl-hexane       | 98  | diethyl succinate                        |
| 42 | ( <i>E</i> )-2,3-epoxydecane | 99  | ethyl valerate                           |
| 43 | acetic acid                  | 100 | ethyl heptanoate                         |
| 44 | ethyl palmitate              | 101 | 1,1-dimethylcyclopropane                 |
| 45 | ethyl heptadecanoate         | 102 | mequinol                                 |
| 46 | 2-butenal                    | 103 | hexyl formate                            |
| 47 | benzaldehyde                 | 104 | ethyl nonanoate                          |
| 48 | hexahydrofarnesylacetone     | 105 | butyl isobutyl phthalate                 |
| 49 | ethyl linolenate             | 106 | Linoleic alcohol                         |
| 50 | ethyl caprylate              | 107 | phenylacetaldehyde                       |
| 51 | acetoin                      | 108 | 3-methyl-2-(2-methyl-2-butenyl)-furan    |
| 52 | isovaleraldehyde             | 109 | dipentene                                |
| 53 | 2-methyl-2,4-hexadiene       | 110 | nonanoic acid                            |
| 54 | 3-furanmethanol              | 111 | dibutyl phthalate                        |
| 55 | ethyl laurate                | 112 | octanoic acid                            |
| 56 | ethyl pentadec-9-enoate      | 113 | 4-hydroxy-2-butanone                     |
| 57 | 2-butyloctanol               | 114 | 2,5-di-tert-butylphenol                  |
|    |                              | 115 | 1-methyl-5-(1-methylethenyl)-cyclohexene |

Table S2: Compounds represented by abscissa numbers and their VIP values in VIP plot

| number | Var ID (Primary)                         | M2.VIP [5] | number | Var ID (Primary)              | M2.VIP [5] |
|--------|------------------------------------------|------------|--------|-------------------------------|------------|
| 1      | methacrolein                             | 3.5692     | 58     | methallyl alcohol             | 0.456093   |
| 2      | ethyl palmitate                          | 3.40473    | 59     | isovaleraldehyde              | 0.449327   |
| 3      | acetic acid                              | 3.01936    | 60     | 2-pyrrolicarbaldehyde         | 0.448799   |
| 4      | methyl hexadecanoate                     | 2.86248    | 61     | acetoin                       | 0.444318   |
| 5      | 9,12-octadecadienoic acid<br>ethyl ester | 2.75584    | 62     | butyl isobutyl<br>phthalate   | 0.435967   |
| 6      | 2-butenal                                | 2.69231    | 63     | ethyl pentadecanoate          | 0.430486   |
| 7      | ethanol                                  | 2.46809    | 64     | ethyl nonanoate               | 0.428012   |
| 8      | ethyl oleate                             | 2.10399    | 65     | 2,5-ditertbutylphenol         | 0.418902   |
| 9      | ethyl acetate                            | 1.90072    | 66     | ethyl octadecanoate           | 0.418039   |
| 10     | phenethyl alcohol                        | 1.88767    | 67     | crotonyl alcohol              | 0.417726   |
| 11     | 2-ethyl-furan                            | 1.66646    | 68     | 1,2-<br>dimethoxybenzene      | 0.405447   |
| 12     | acetaldehyde                             | 1.63239    | 69     | 2-pentylfuran                 | 0.391383   |
| 13     | trimethyl-pyrazine                       | 1.38892    | 70     | 2-ethyl-5-methyl-<br>pyridine | 0.384293   |
| 14     | ethyl (9E)-9-octadecenoate               | 1.38705    | 71     | ethyl linolenate              | 0.377197   |
| 15     | (R,R)-2,3-butanediol                     | 1.37848    | 72     | hexyl formate                 | 0.374109   |
| 16     | ethyl caproate                           | 1.33368    | 73     | 4,6-dimethyldodecane          | 0.367797   |

|    |                               |          |     |                                          |          |
|----|-------------------------------|----------|-----|------------------------------------------|----------|
| 17 | 4-hydroxy-2-butanone          | 1.23432  | 74  | ethyl isovalerate                        | 0.366347 |
| 18 | 2,3-butanediol                | 1.18601  | 75  | dipentene                                | 0.362084 |
| 19 | crotonaldehyde                | 1.09161  | 76  | diethyl phthalate                        | 0.341839 |
| 20 | 2-methyl-pyrazine             | 1.06549  | 77  | 4,6-dimethyl-undecane                    | 0.332404 |
| 21 | 2-methyl-2,4-hexadiene        | 1.0309   | 78  | ethyl heptanoate                         | 0.322822 |
| 22 | 2-furanmethanol               | 1.02483  | 79  | 3-methyl-2-(2-methyl-2-butenyl)-furan    | 0.317123 |
| 23 | 2,2,4,6,6-pentamethyl-heptane | 1.02267  | 80  | 7,9-dimethyl-hexadecane                  | 0.303638 |
| 24 | isobutyric acid               | 1.00276  | 81  | isobutyl alcohol                         | 0.282685 |
| 25 | 2-phenyl-2-butenal            | 0.965845 | 82  | 2,3,3-trimethyl-pentane                  | 0.279388 |
| 26 | dibutyl terephthalate         | 0.963231 | 83  | 1-methyl-5-(1-methylethenyl)-cyclohexene | 0.275691 |
| 27 | 1,1-dimethylcyclopropane      | 0.962852 | 84  | 11,14-eicosadienoicacid                  | 0.272222 |
| 28 | ethyl caprylate               | 0.961584 | 85  | phenol                                   | 0.266546 |
| 29 | benzaldehyde                  | 0.933607 | 86  | decane                                   | 0.266515 |
| 30 | dibutyl phthalate             | 0.903617 | 87  | ethyl pentadec-9-enoate                  | 0.261686 |
| 31 | isopentyl formate             | 0.899145 | 88  | 2,6,10-trimethyldodecane                 | 0.254341 |
| 32 | 2-vinyl-2-butenal             | 0.873774 | 89  | caryophyllene                            | 0.241697 |
| 33 | ethyl myristate               | 0.869219 | 90  | ethyl heptadecanoate                     | 0.239037 |
| 34 | furfural                      | 0.790308 | 91  | octanoic acid                            | 0.238003 |
| 35 | ethyl lactate                 | 0.773015 | 92  | ethyl butyrate                           | 0.233453 |
| 36 | 2-butyloctanol                | 0.741799 | 93  | 11,14,17-eicosatrienoicacid              | 0.230276 |
| 37 | hexahydrofarnesylacetone      | 0.728119 | 94  | Linoleic alcohol                         | 0.221346 |
| 38 | 2,3-dimethyl-pyrazine         | 0.714096 | 95  | 4-methylnonane                           | 0.217782 |
| 39 | pentadecane                   | 0.711463 | 96  | decene                                   | 0.213525 |
| 40 | 3,5-dimethylpyrazole          | 0.690514 | 97  | 2,2,11,11-tetramethyl-dodecane           | 0.210898 |
| 41 | 1,2-dimethyl-hydrazine        | 0.680933 | 98  | ethyl valerate                           | 0.204145 |
| 42 | styrene                       | 0.65732  | 99  | 1-methyl-2-(3-methylpentyl)-cyclopropane | 0.196417 |
| 43 | ethyl laurate                 | 0.656969 | 100 | eicosane                                 | 0.188898 |
| 44 | 2,5-dimethyl-pyrazine         | 0.653073 | 101 | 2,3,4-trimethyl-hexane                   | 0.181269 |
| 45 | 3-furanmethanol               | 0.641658 | 102 | mequinol                                 | 0.177185 |

|    |                                   |          |     |                                               |           |
|----|-----------------------------------|----------|-----|-----------------------------------------------|-----------|
| 46 | 1,3,5,7-cyclooctatetraene         | 0.639318 | 103 | methyl anthranilate                           | 0.175919  |
| 47 | ethyl isobutyrate                 | 0.626934 | 104 | 2-acetyl pyrrole                              | 0.172074  |
| 48 | benzyl alcohol                    | 0.604273 | 105 | ethyl 5-amino-1,2,3-thiadiazole-4-carboxylate | 0.15786   |
| 49 | phenylacetaldehyde                | 0.5822   | 106 | dodecane                                      | 0.1568    |
| 50 | 4,6-dimethyl-pyrimidine           | 0.575103 | 107 | isobutyraldehyde                              | 0.150123  |
| 51 | diethyl succinate                 | 0.538253 | 108 | (E)-2,3-epoxydecane                           | 0.146915  |
| 52 | methyl 2-(propanoylamino)benzoate | 0.493848 | 109 | 2,8-dimethylundecanoic acid methyl ester      | 0.130016  |
| 53 | isopentyl alcohol                 | 0.493784 | 110 | 2,5-dihydrofuran                              | 0.126053  |
| 54 | isoamyl acetate                   | 0.490105 | 111 | methanethiol                                  | 0.0935    |
| 55 | dihydroaplotaxene                 | 0.48715  | 112 | 2,6-dimethyl-pyrazine                         | 0.0913453 |
| 56 | nonanoic acid                     | 0.46522  | 113 | 3,8-dimethyl-undecane                         | 0.0885825 |
| 57 | (E,E)-2,4-hexadienal              | 0.463235 | 114 | 2,6-dimethyl-heptadecane                      | 0.087334  |
|    |                                   |          | 115 | 2-methylhexadecanoic acid                     | 0.0800639 |
